# Supplementary material
Source: PubMed Central journal article supplement (PMC4346559)
Supplement: EC.00141-14_zek999094399so1.pdf [file EC.00141-14_zek999094399so1.pdf]

**Fig S1.** Localization of Ldp1 in *S. cerevisiae* cells cultured in the absence of exogenous oleic acid. The culture condition was similar to that described in Materials and Methods. The arrows indicated the LD localization of Ldp1 and large LDs in cells overexpressing YLDP1-GFP. Bar = 5  $\mu\text{m}$ .

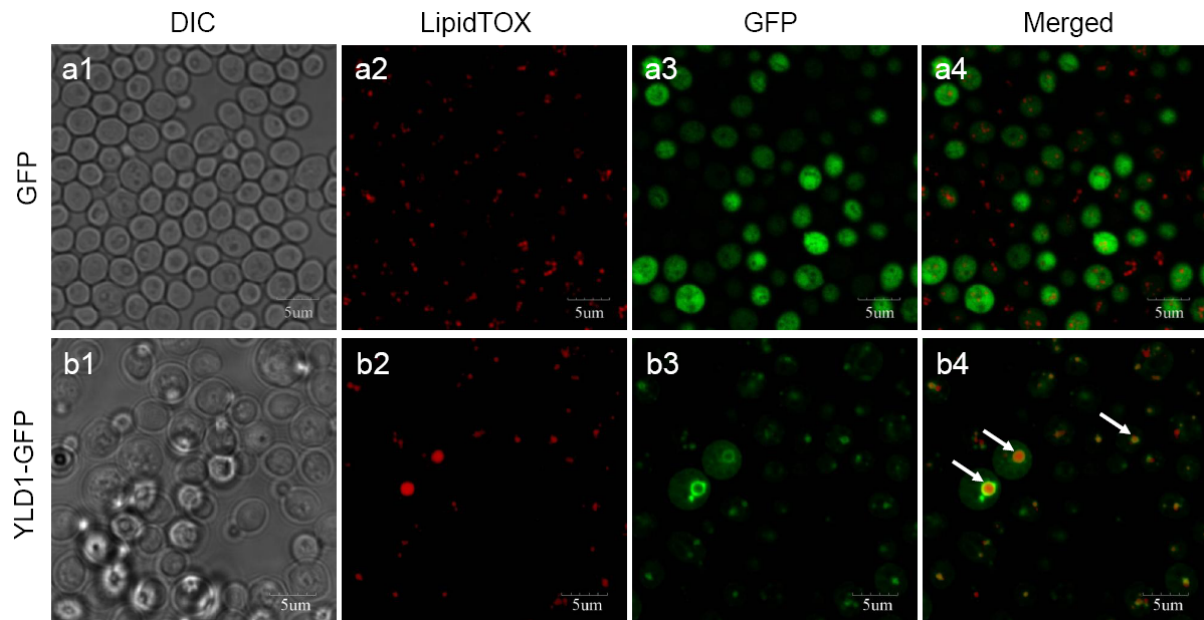

**Supplemental Table 1.** Oligonucleotide primers used for RT-qPCR analysis.

| Target gene                    | Oligonucleotides (5' - 3')                                | Exon spanning <sup>1</sup> | Size of product (bp) | Efficiency % | R <sup>2</sup> |
|--------------------------------|-----------------------------------------------------------|----------------------------|----------------------|--------------|----------------|
| <i>RHTO_07686</i>              | F: ctcgctcgctccatccaa<br>R: atcgggcggctggttctg            |                            | 110                  | 96.12        | 0.997          |
| <i>RHTO_02004</i>              | F: catcctcgcttagaccacg<br>R: gaagacaaaggcaacgagaacc       |                            | 99                   | 96.99        | 0.999          |
| <i>RHTO_02032</i>              | F: atccgccaggtcgtcaaca<br>R: cactcgcccgaaggtaagg          |                            | 218                  | 94.23        | 0.984          |
| <i>RHTO_03915</i>              | F: cggcaccttgaacggcttg<br>R: cgtctactggcgtgctgg           | Exons                      | 166                  | 95.89        | 0.998          |
| <i>RHTO_04192</i>              | F: catttgctcacctacgtacca<br>R: tccacgtcctccatctgc         | Junction                   | 130                  | 93.52        | 0.992          |
| <i>RHTO_00856</i>              | F: acatcacgggttatggtgtctgg<br>R: tctactcgcgagtgaggcttacgg | Exons                      | 174                  | 90.20        | 0.999          |
| <i>RHTO_05627</i>              | F: ccacattcgcaaggaggtcac<br>R: cgccgtcccttctccacac        | Exons                      | 204                  | 95.65        | 0.998          |
| <i>RHTO_03165</i>              | F: gattttaccggagcgcaccac<br>R: gcgagcgcgaatgttgacgata     | Exons                      | 230                  | 97.57        | 0.988          |
| <i>RHTO_01062</i>              | F: cgagggatactgagataacgggtgc<br>R: aagaaccaaagcgaagcgaaac |                            | 125                  | 96.63        | 0.998          |
| <i>RHTO_03560</i> <sup>2</sup> | F: gctgtcttcccctcgattgt<br>R: gggtcaggataccacgcttc        | Junction                   | 115                  | 93.15        | 0.998          |
| <i>RHTO_03746</i> <sup>3</sup> | F: ggtatgcacctcaacgaca<br>R: gacgagcaagtccacgacac         | Exons                      | 90                   | 94.33        | 1.000          |

1. Exons: two primers are located in different exons; Junction: primer spans an exon-exon border.
2. Coding for the actin
3. Coding for glyceraldehyde 3-phosphate dehydrogenase
